# Supplementary material for: Mesoporous TiO2 with high packing density for superior lithium storage
Source: Royal Society of Chemistry journal article supplement (doi:10.1039/c003630g), 2010-01-01
Supplement: c003630g.pdf [file c003630g.pdf]

## Supporting information

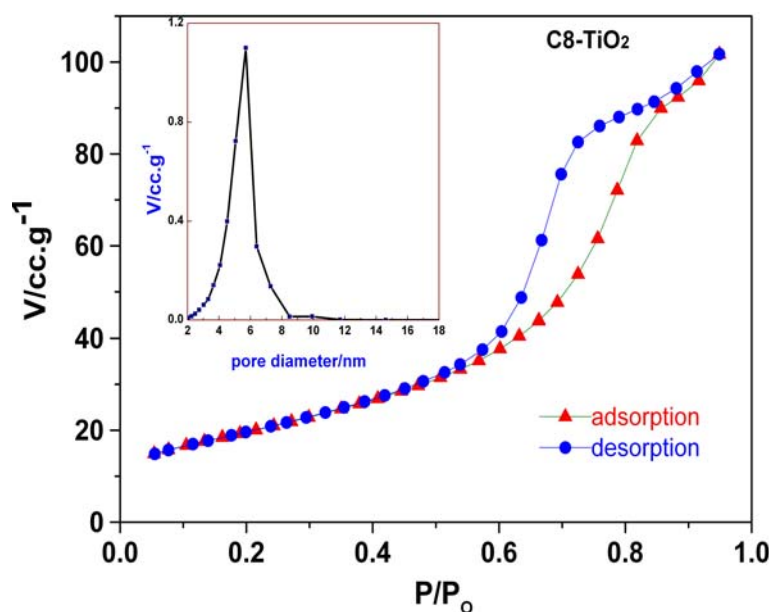

Fig. S1 N<sub>2</sub> adsorption/desorption isotherm of C8-TiO<sub>2</sub>.

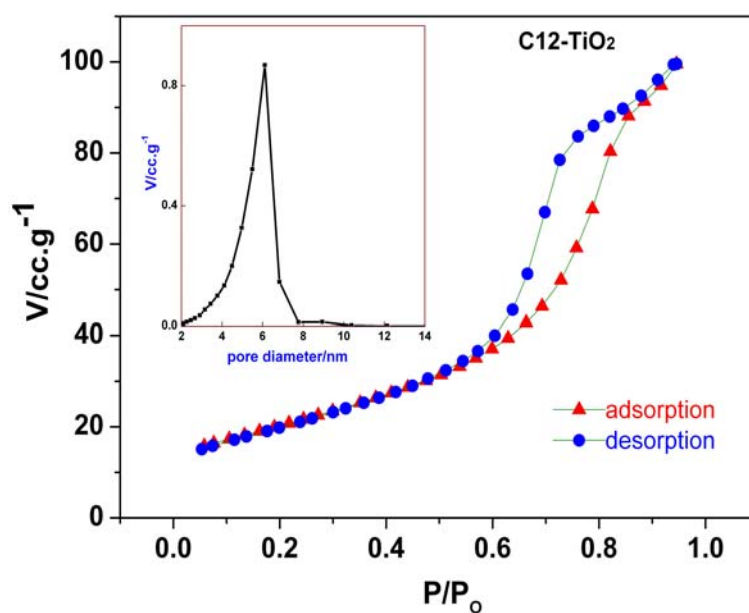

Fig. S2 N<sub>2</sub> adsorption/desorption isotherm of C12-TiO<sub>2</sub>.

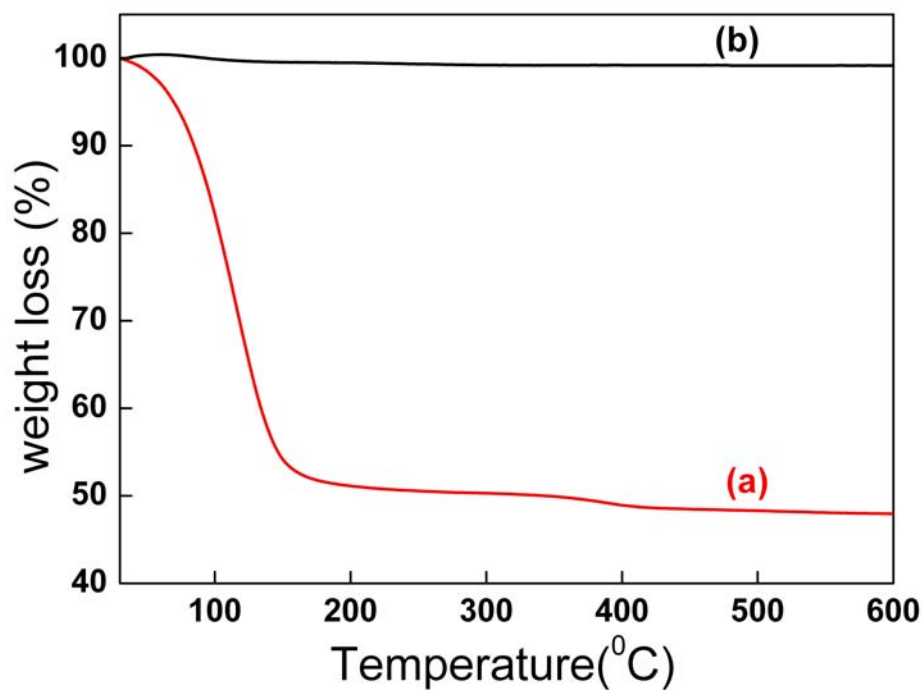

Fig. S3 TGA curves a) before heat treatment of the precursor in air, b) after calcination at 450  $^{\circ}\text{C}$ /6 h in air.

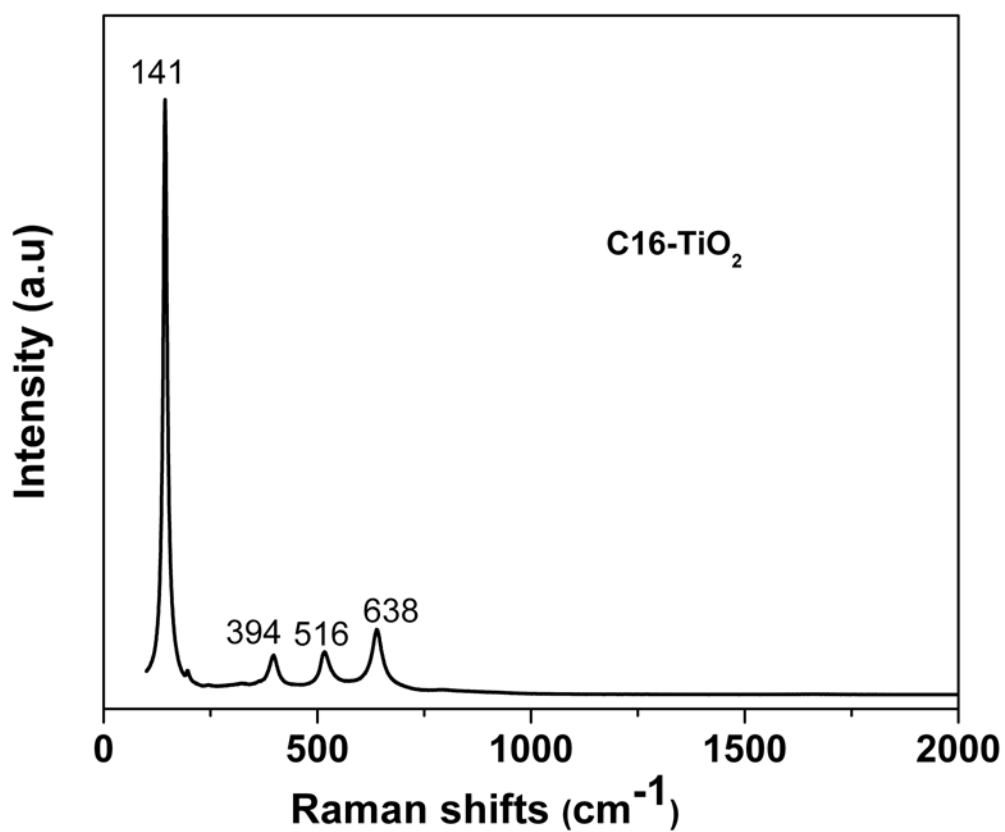

Fig. S4 Raman spectrum of meso C16-TiO<sub>2</sub>

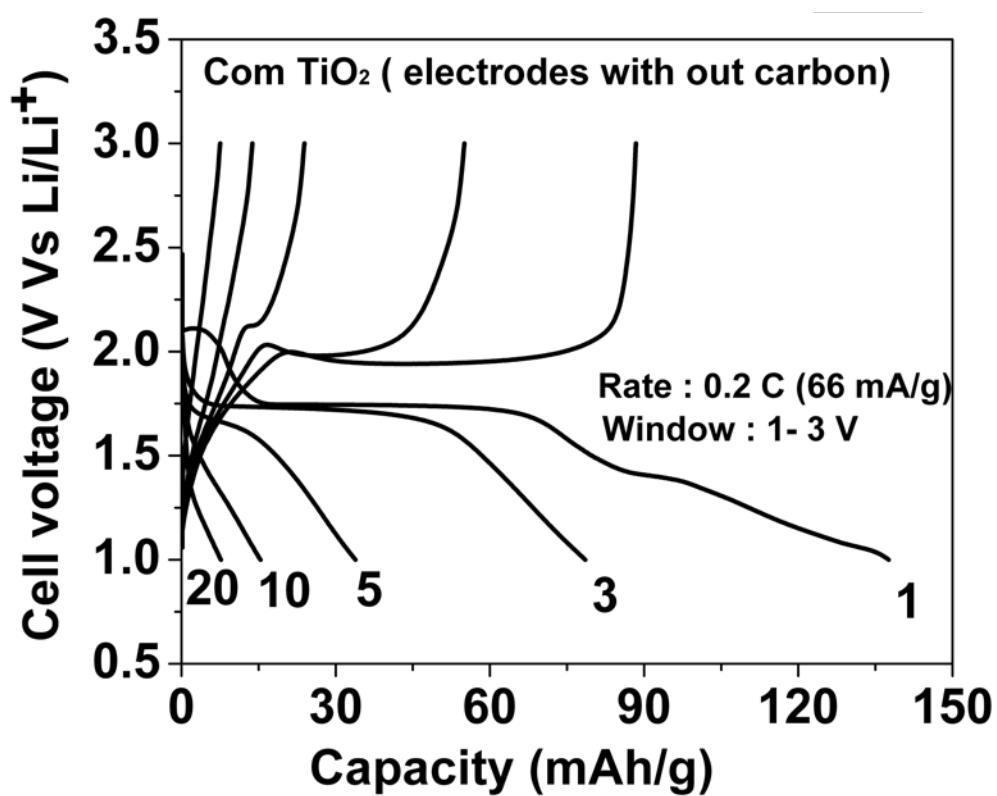

**Fig. S5** Charge–discharge voltage profiles of Commercial-TiO<sub>2</sub> (electrodes without carbon)
